# Supplementary material
Source: publisher figshare collection journal article supplement (https://karger.figshare.com/ndownloader/files/27061943)
Supplement: Supplementary file 1 [file 27061943]

Supplementary Table 2 Sensitive analysis of grade

| Study omitted | HR (95%CI) |
| --- | --- |
| Dong et al 2019 | 6.33 [3.65, 10.97] |
| Genç et al 2018 | 5.65 [2.91, 10.95] |
| Harimoto et al 2019 | 4.86 [2.72, 8.70] |
| Lopez-Aguiar 2019 | 6.08 [3.33, 11.11] |
| Mao et al 2020 | 5.72 [3.14, 10.42] |
| Pulvirenti et al 2019 | 4.67 [2.68, 8.16] |
| Xu et al 2019 | 5.39 [2.84, 10.25] |
| Zou et al 2020 | 4.73 [2.66, 8.42] |
| Combined | 5.40 [3.09, 9.46] |
